# Supplementary material
Source: PubMed Central journal article supplement (PMC3174382)
Supplement: emm-43-479-s001.pdf [file emm-43-479-s001.pdf]

## Supplemental Data

**Table S1.** Primer sequences used in RT-PCR for detection of lymphangiogenic cytokines

|        |         | Primer sequence          |
|--------|---------|--------------------------|
| LYVE   | Forward | aggagccctctcctt act gc   |
|        | Reverse | acctggaagcctgtctctga     |
| VEGF-C | Forward | caaggetttcaaggaccag      |
|        | Reverse | tcccctgtcctggattgag      |
| VEGF-D | Forward | ccagctggactgtgt gag aa   |
|        | Reverse | gggagtacaggctgctctg      |
| Prox-1 | Forward | agacttgaccaccgtgt cc     |
|        | Reverse | gga gat ggctgagaacaagc   |
| GAPDH  | Forward | ttcaccaccatg gag aaggc   |
|        | Reverse | ggcatggac tat ggt cat ga |
